# Supplementary material
Source: PubMed Central journal article supplement (PMC8484508)
Supplement: mmc1.pdf [file mmc1.pdf]

**Cell Reports Medicine, Volume 2**

**Supplemental information**

**Performance of crisis standards of care guidelines**

**in a cohort of critically ill COVID-19 patients**

**in the United States**

**Julia L. Jezmir, Maheetha Bharadwaj, Alexander Chaitoff, Bradford Diephuis, Conor P. Crowley, Sandeep P. Kishore, Eric Goralnick, Louis T. Merriam, Aimee Milliken, Chanu Rhee, Nicholas Sadochnikoff, Sejal B. Shah, Shruti Gupta, David E. Leaf, William B. Feldman, Edy Y. Kim, and the STOP-COVID Investigators**

## Supplemental Information

### Performance of Crisis Standards of Care Guidelines in a Cohort of Critically Ill COVID-19 Patients in the United States

Jezmir\*, Bharadwaj\* et al.

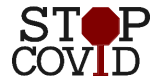

Study of the Treatment and Outcomes in critically ill Patients with COVID-19

## **Table of Contents:**

|                                                                                                                   |           |
|-------------------------------------------------------------------------------------------------------------------|-----------|
| <b>Table S1. STOP-COVID Investigators and Participating Sites</b>                                                 | <b>3</b>  |
| <b>Table S2. SOFA (“sSOFA”) score calculation.</b>                                                                | <b>6</b>  |
| <b>Table S3. Approach to Comorbidity Scoring in Colorado’s algorithm</b>                                          | <b>7</b>  |
| <b>Table S4. CSC algorithm performance in groups of two and five comparisons by race</b>                          | <b>9</b>  |
| <b>Figure S1. Study Cohort</b>                                                                                    | <b>11</b> |
| <b>Figure S2. Sensitivity analysis for the association of priority scores or categories with 28-day mortality</b> | <b>12</b> |
| <b>Figure S3. Performance of CSC algorithms according to race or ethnicity</b>                                    | <b>13</b> |

## Table S1. STOP-COVID Investigators and Participating Sites

**Baylor College of Medicine:** Carl P. Walther\*, Samaya J. Anumudu  
**Baylor University Medical Center:** Justin Arunthamakun\*, Kathleen F. Kopecky, Gregory P. Milligan, Peter A. McCullough, Thuy-Duyen Nguyen  
**Beth Israel Deaconess Medical Center:** Shahzad Shaefi\*, Megan L. Krajewski, Sidharth Shankar, Aameeka Pannu, Juan D. Valencia  
**Boston Medical Center:** Sushrut S. Waikar\*, Zoe A. Kibbelaar  
**Cook County Health:** Ambarish M. Athavale\*, Peter Hart, Shristi Upadhyay, Ishaan Vohra, Ajiboye Oyintayo  
**Cooper University Health Care:** Adam Green\*, Jean-Sebastien Rachoin, Christa A. Schorr, Lisa Shea  
**Duke University Medical Center:** Daniel L. Edmonston\*, Christopher L. Mosher  
**Hackensack Meridian Health Mountainside Medical Center:** Alexandre M. Shehata\*, Zaza Cohen, Valerie Allusson, Gabriela Bambrick-Santoyo, Noor ul aain Bhatti, Bijal Mehta, Aquino Williams  
**Hackensack Meridian Health Hackensack University Medical Center:** Samantha K. Brenner\*, Patricia Walters, Ronaldo C. Go, Keith M. Rose  
**Harvard T.H. Chan School of Public Health:** Miguel A. Hernán  
**Harvard University:** Amy M. Zhou, Ethan C. Kim, Rebecca Lisk  
**Icahn School of Medicine at Mount Sinai:** Lili Chan\*, Kusum S. Mathews\*, Steven G. Coca, Deena R. Altman, Aparna Saha, Howard Soh, Hwei Hsun Wen, Sonali Bose, Emily A. Leven, Jing G. Wang, Gohar Mosoyan, Girish N. Nadkarni, Pattharawin Pattharanitima, Emily J. Gallagher  
**Indiana University School of Medicine/Indiana University Health:** Allon N. Friedman\*, John Guirguis, Rajat Kapoor, Christopher Meshberger, Katherine J. Kelly  
**Johns Hopkins Hospital:** Chirag R. Parikh\*, Brian T. Garibaldi, Celia P. Corona-Villalobos, Yumeng Wen, Steven Menez, Rubab F. Malik, Elena Cervantes, Samir Gautam  
**Kings County Hospital Center:** Mary C. Mallappallil\*, Jie Ouyang, Sabu John, Ernie Yap, Yohannes Melaku, Ibrahim Mohamed, Siddhartha Bajracharya, Isha Puri, Mariah Thaxton, Jyotsna Bhattacharya, John Wagner, Leon Boudourakis  
**Loma Linda University:** H. Bryant Nguyen\*, Afshin Ahoumim  
**Mayo Clinic, Arizona:** Leslie F. Thomas\*, Dheeraj Reddy Sirganagari  
**Mayo Clinic, Florida:** Pramod K. Guru\*  
**Mayo Clinic, Rochester:** Kianoush Kashani\* and Shahrzad Tehranian  
**Medical College of Wisconsin:** Yan Zhou,\* Paul A. Bergl, Jesus Rodriguez, Jatan A. Shah, Mrigank S. Gupta  
**MedStar Georgetown University Hospital:** Princy N. Kumar\*, Deepa G. Lazarous, Seble G. Kassaye  
**Montefiore Medical Center/Albert Einstein College of Medicine:** Michal L. Melamed\*, Tanya S. Johns, Ryan Mocerino, Kalyan Prudhvi, Denzel Zhu, Rebecca V. Levy, Yorg Azzi, Molly Fisher, Milagros Yunes, Kaltrina Sedaliu, Ladan Golestaneh, Maureen Brogan, Neelja Kumar, Michael Chang, Jyotsana Thakkar  
**New York-Presbyterian Queens Hospital:** Ritesh Raichoudhury\*, Akshay Athreya, Mohamed Farag  
**New York-Presbyterian/Weill Cornell Medical Center:** Edward J. Schenck\*, Soo Jung Cho, Maria Platakis, Sergio L. Alvarez-Mulett, Luis G. Gomez-Escobar, Di Pan, Stefi Lee, Jamuna Krishnan, William Whalen  
**New York University Langone Hospital:** David Charytan\*, Ashley Macina, Sobaata Chaudhry, Benjamin Wu, Frank Modersitzki  
**Northwestern Memorial Hospital:** Northwestern University Feinberg School of Medicine - Anand Srivastava\*, Alexander S. Leidner, Carlos Martinez, Jacqueline M. Kruser, Richard G. Wunderink, Alexander J. Hodakowski  
**Ochsner Medical Center:** Juan Carlos Q. Velez\*, Eboni G. Price-Haywood, Luis A. Matute-Trochez, Anna E. Hasty, Muner MB. Mohamed  
**Oregon Health and Science University Hospital:** Rupali S. Avasare\*, David Zonies\*  
**Mass General Brigham:** Brigham and Women's Hospital, Brigham and Women's Faulkner Hospital, Massachusetts General Hospital, and Newton Wellesley Hospital - David E. Leaf\*, Shruti Gupta\*, Meghan E. Sise, Erik T. Newman, Samah Abu Omar, Kapil K. Pokharel, Shreyak Sharma, Harkarandeep Singh, Simon Correa, Tanveer Shaukat, Omer Kamal, Wei Wang, Heather Yang, Jeffery O. Boateng, Meghan Lee, Ian A. Strohbehn, Jiahua Li, Ariel L. Mueller  
**ProMedica Health System:** Roberta Redfern,\* Nicholas S. Cairl, Gabriel Naimy, Abeer Abu-Saif, Danyell Hall, Laura Bickley  
**Renown Health:** Chris Rowan\*, Farah Madhani-Lovely\*, Vivian S. Cruz, Kristen M. Hess, Alanna L. Jacobs

**Rush University Medical Center:** Vasil Peev\*, Jochen Reiser, John J. Byun, Andrew Vissing, Esha M. Kapania, Zoe Post, Nilam P. Patel, Joy-Marie Hermes

**Rutgers/New Jersey Medical School:** Anne K. Sutherland\*, Ameer Patrawalla, Diana G. Finkel, Barbara A. Danek, Sowminya Arikapudi, Jeffrey M. Paer, Peter Cangialosi, Mark Liotta

**Rutgers/Robert Wood Johnson Medical School:** Jared Radbel\*, Sonika Puri, Jag Sunderram, Matthew T. Scharf, Ayesha Ahmed, Ilya Berim, Jayanth S. Watson

**Stanford Healthcare:** Stanford University School of Medicine – Shuchi Anand\*, Joseph E. Levitt, Pablo Garcia

**Temple University Hospital:** Suzanne M. Boyle\*, Rui Song

**Thomas Jefferson University Hospital:** Jingjing Zhang\*, Sang Hoon Woo, Xiaoying Deng, Goni Katz-Greenberg, Katharine Senter

**Tulane Medical Center:** Moh'd A. Sharshir\*, Vadym V. Rusnak

**United Health Services Hospitals:** Muhammad Imran Ali

**University of Colorado Anschutz Medical Campus:** Anip Bansal\*, Amber S. Podoll, Michel Chonchol, Sunita Sharma, Ellen L. Burnham

**University Hospitals Cleveland Medical Center:** Arash Rashidi\*, Rana Hejal

**University of Alabama-Birmingham Hospital:** Eric Judd\*, Laura Latta, Ashita Tolwani

**University of California-Davis Medical Center:** Timothy E. Albertson\*, Jason Y. Adams

**University of California-Los Angeles Medical Center:** Ronald Reagan-UCLA Medical Center - Steven Y. Chang\*, Rebecca M. Beutler; UCLA Medical Center, Santa Monica – Carl E. Schulze

**University of California-San Diego Medical Center:** Etienne Macedo\*, Harin Rhee

**University of California-San Francisco Medical Center:** Kathleen D. Liu\*, Vasantha K. Jotwani

**University of Chicago Medical Center:** Jay L. Koyner\*

**University of Florida Health-Gainesville:** Chintan V. Shah\*

**University of Florida-Health-Jacksonville:** Vishal Jaikaransingh\*

**University of Illinois Hospital and Health Sciences System:** Stephanie M. Toth-Manikowski\*, Min J. Joo\*, James P. Lash

**University of Kentucky Medical Center:** Javier A. Neyra\*, Nourhan Chaaban, Madona Elias, Yahya Ahmad

**University Medical Center of Southern Nevada:** Alfredo Iardino, Elizabeth H. Au, Jill H. Sharma

**University of Miami Health System:** Marie Anne Sosa\*, Sabrina Taldone, Gabriel Contreras, David De La Zerda, Hayley B. Gershengorn, Bhavarth Shukla, Alessia Fornoni, Tanira Ferreira

**University of Michigan:** Salim S. Hayek\*, Penelope Blakely, Hanna Berlin, Tariq U. Azam, Husam Shadid, Michael Pan, Patrick O' Hayer, Chelsea Meloche, Rafey Feroze, Rayan Kaakati, Danny Perry, Abbas Bitar, Elizabeth Anderson, Kishan J. Padalia, John P. Donnelly, Andrew J. Admon

**University of North Carolina School of Medicine:** Jennifer E. Flythe\*, Matthew J. Tugman, Emily H. Chang

**University of Oklahoma Health Sciences Center:** Brent R. Brown\*

**University of Pennsylvania Health System:** Amanda K. Leonberg-Yoo\*, Ryan C. Spiardi, Todd A. Miano, Meaghan S. Roche, Charles R. Vasquez

**University of Pittsburgh Medical Center:** Amar D. Bansal\*, Natalie C. Ernecoff, Sanjana Kapoor, Siddharth Verma, Huiwen Chen

**University of Tennessee Health Science Center and Memphis VA Medical Center/Methodist University Hospital –** Csaba P. Kovesdy\*, Miklos Z. Molnar\*, Ambreen Azhar

**University of Texas Southwestern Medical Center and Parkland Health and Hospital System:** S. Susan Hedayati\*, Mridula V. Nadamuni, Shani Shastri, Duwayne L. Willett

**University of Vermont Larner College of Medicine:** Samuel A.P. Short

**University of Virginia Health System:** Amanda D. Renaghan\*, Kyle B. Enfield

**University of Washington Medical Center:** Pavan K. Bhatraju\*, A. Bilal Malik

**Vanderbilt University Medical Center:** Matthew W. Semler

**Washington University in St. Louis/Barnes Jewish Hospital:** Anitha Vijayan\*, Christina Mariyam Joy, Tingting Li, Seth Goldberg, Patricia F. Kao

**Wellforce Health System:** Lowell General Hospital - Greg L. Schumaker\*, Tufts Medical Center - Nitender Goyal\*, Anthony J. Faugno, Greg L. Schumaker, Caroline M. Hsu, Asma Tariq, Leah Meyer, Ravi K. Kshirsagar, Daniel E. Weiner, Aju Jose

**Westchester Medical Center:** Marta Christov\*, Jennifer Griffiths, Sanjeev Gupta, Aromma Kapoor

**Yale School of Medicine:** Perry Wilson,\* Tanima Arora, Ugochukwu Ugwuowo

\*Site Principal Investigator

|                                                                 |
|-----------------------------------------------------------------|
| <b>Northeast</b>                                                |
| Beth Israel Deaconess Medical Center                            |
| Brigham and Women's Faulkner Hospital                           |
| Brigham and Women's Hospital                                    |
| Cooper University Health Care                                   |
| Hackensack Meridian Health Hackensack University Medical Center |
| Hackensack Mountainside Hospital                                |
| Johns Hopkins Hospital                                          |
| Kings County Hospital Center                                    |
| Lowell General Hospital                                         |
| Massachusetts General Hospital                                  |
| MedStar Georgetown University Hospital                          |
| Montefiore Medical Center                                       |
| Mount Sinai                                                     |
| Newton Wellesley Hospital                                       |
| New York-Presbyterian Queens Hospital                           |
| New York-Presbyterian/Weill Cornell Medical Center              |
| New York University Langone Hospital                            |
| Rutgers/New Jersey Medical School                               |
| Rutgers/Robert Wood Johnson Medical School                      |
| Temple University Hospital                                      |
| Jefferson Health                                                |
| Tufts Medical Center                                            |
| United Health Services Hospitals                                |
| University of Pennsylvania Health System                        |
| University of Pittsburgh Medical Center                         |
| Westchester Medical Center                                      |
| Yale University Medical Center                                  |
| <b>South</b>                                                    |
| Baylor College of Medicine, Houston                             |
| Baylor University Medical Center/Baylor Scott White and Health  |
| Duke University Medical Center                                  |
| Mayo Clinic, Florida                                            |
| Memphis VA Medical Center                                       |
| Methodist University Hospital                                   |
| Ochsner Medical Center                                          |
| Tulane Medical Center                                           |

|                                                            |
|------------------------------------------------------------|
| University of Alabama-Birmingham Hospital                  |
| University of Florida Health-Gainesville                   |
| University of Florida Health-Jacksonville                  |
| University of Miami Health System                          |
| University of North Carolina Hospitals                     |
| University of Texas Southwestern Medical Center            |
| University of Virginia Health System                       |
| <b>Midwest</b>                                             |
| Barnes-Jewish Hospital                                     |
| Cook County Health                                         |
| Froedtert Hospital                                         |
| Indiana University Health Methodist Hospital               |
| Mayo Clinic, Rochester                                     |
| Northwestern Memorial Hospital                             |
| Promedica Health System                                    |
| Rush University Medical Center                             |
| University Hospitals Cleveland Medical Center              |
| University of Chicago Medical Center                       |
| University of Illinois Hospital and Health Sciences System |
| University of Kentucky Hospital                            |
| University of Michigan Hospital                            |
| University of Oklahoma Health Sciences Center              |
| <b>West</b>                                                |
| Loma Linda University Medical Center                       |
| Mayo Clinic, Arizona                                       |
| Oregon Health and Science University Hospital              |
| Renown Health                                              |
| Stanford Healthcare                                        |
| University of California-Davis Medical Center              |
| University of California-Los Angeles Medical Center        |
| University of California-San Diego Medical Center          |
| University of California-San Francisco Medical Center      |
| UCHealth University of Colorado                            |
| University Medical Center of Southern Nevada               |
| University of Washington Medical Center                    |

**Table S2. SOFA (“sSOFA”) score calculation.**

This study adapted standard SOFA scoring to the data in the clinical registry, as highlighted in Table S2A (grey). Since study sites typically utilized norepinephrine as the first vasopressor, thus the use of one vasopressor was assigned a score of 3, to correspond to the scoring for initiation of norepinephrine in standard SOFA scoring. The dataset allowed scoring of the presence or absence of altered mental status (AMS) but not the Glasgow Coma Score (GCS).

**2A. Adapted SOFA scoring**

|                                                        | Adapted SOFA Scoring |         |         |         |      |
|--------------------------------------------------------|----------------------|---------|---------|---------|------|
|                                                        | 0                    | 1       | 2       | 3       | 4    |
| SOFA Respiratory (PaO <sub>2</sub> :FiO <sub>2</sub> ) | ≥400                 | 300-399 | 200-299 | 100-199 | <100 |

|                                                  |        |            |          |            |                            |
|--------------------------------------------------|--------|------------|----------|------------|----------------------------|
| SOFA Coagulation (Platelets, K/mm <sup>3</sup> ) | ≥150   | 100-149    | 50-99    | 20-49      | <20                        |
| SOFA Liver (Bilirubin, mg/dl)                    | <1.2   | 1.2-1.9    | 2.0-5.9  | 6.0-11.9   | ≥12                        |
| SOFA Cardiovascular (#vasopressors/inotropes)    | 0      |            |          | 1          | ≥2                         |
| SOFA CNS                                         | No AMS | AMS        |          |            |                            |
| SOFA Renal (Creatinine mg/dl)                    | Cr<1.2 | Cr 1.2-1.9 | Cr 2-3.4 | Cr 3.5-4.9 | Cr ≥5 or Acute RRT or ESRD |

Abbreviations: SOFA, Sequential Organ Failure Assessment; AMS, Altered Mental Status; CNS: Central Nervous System; RRT, Renal Replacement Therapy; ESRD, End-Stage Renal Disease

**2B. Standard SOFA scoring**

|                                                        | Standard SOFA Scoring |            |                  |                                 |                              |
|--------------------------------------------------------|-----------------------|------------|------------------|---------------------------------|------------------------------|
|                                                        | 0                     | 1          | 2                | 3                               | 4                            |
| SOFA Respiratory (PaO <sub>2</sub> :FiO <sub>2</sub> ) | ≥400                  | 300-399    | 200-299          | 100-199                         | <100                         |
| SOFA Coagulation (Platelets, K/mm <sup>3</sup> )       | ≥150                  | 100-149    | 50-99            | 20-49                           | <20                          |
| SOFA Liver (Bilirubin, mg/dl)                          | <1.2                  | 1.2-1.9    | 2.0-5.9          | 6.0-11.9                        | ≥12                          |
| SOFA Cardiovascular                                    | MAP>70                | MAP<70     | dopa≤5 or dobuta | dopa>5, epi≤0.1, or norepi ≤0.1 | dopa>15, epi>0.1, norepi>0.1 |
| SOFA CNS (Glasgow Coma Score)                          | 15                    | 13-14      | 10-12            | 6-9                             | <6                           |
| SOFA Renal (Creatinine mg/dl)                          | Cr<1.2                | Cr 1.2-1.9 | Cr 2-3.4         | Cr 3.5-4.9                      | Cr ≥5 or Acute RRT or ESRD   |

Abbreviations: MAP, Mean Arterial Pressure; Dopa, dopamine; Dobuta, dobutamine; Epi, epinephrine, norepi, norepinephrine

**Table S3. Approach to Comorbidity Scoring in Colorado’s algorithm**

Colorado’s algorithm uses the Charlson Comorbidity Index to assign priority points (left). To adapt to the comorbidity data in the STOP-COVID registry, Colorado’s comorbidities’ scoring was modified (right). Comorbidities are defined in Table S3B.

**S3A. Modification of comorbidity scoring in Colorado’s algorithm.**

| Colorado’s scoring of comorbidities<br>(Charlson Comorbidity Index) |        | Modification of comorbidities’ scoring for this study   |        |
|---------------------------------------------------------------------|--------|---------------------------------------------------------|--------|
| Comorbidity                                                         | Points | Comorbidity                                             | Points |
| Age                                                                 |        | Age                                                     |        |
| <50                                                                 | 0      | <50                                                     | 0      |
| 50-59                                                               | 1      | 50-59                                                   | 1      |
| 60-69                                                               | 2      | 60-69                                                   | 2      |
| 70-79                                                               | 3      | 70-79                                                   | 3      |
| >=80                                                                | 4      | >=80                                                    | 4      |
| Chronic Heart Failure                                               | 2      | Chronic Heart Failure                                   | 2      |
| Dementia                                                            | 2      |                                                         |        |
| Chronic Pulmonary Disease                                           | 1      | Chronic Pulmonary Disease                               | 1      |
| Connective Tissue Disease                                           | 1      |                                                         |        |
| Liver Disease                                                       |        | Liver Disease                                           | 2      |
| Mild                                                                | 2      |                                                         |        |
| Moderate or<br>Severe                                               | 4      |                                                         |        |
| Diabetes Mellitus with<br>Chronic Complications                     | 1      | Diabetes Mellitus                                       | 1      |
| Hemiplegia                                                          | 2      |                                                         |        |
| Renal Disease                                                       | 1      | Renal Disease                                           | 1      |
| Metastatic Solid Tumor                                              | 6      |                                                         |        |
| Any active malignancy<br>including<br>leukemia/lymphoma             | 2      | Any active malignancy<br>including<br>leukemia/lymphoma | 2      |
| AIDS                                                                | 4      |                                                         |        |



**Table S3B. Definitions of the comorbidities in the modified Colorado Algorithm.**

| <b>Modified Charlson Comorbidities Measures</b>   | <b>Coexisting Condition per STOP-COVID Study</b> | <b>Definition of Coexisting Condition</b>                                                                                                                                                                                |
|---------------------------------------------------|--------------------------------------------------|--------------------------------------------------------------------------------------------------------------------------------------------------------------------------------------------------------------------------|
| Chronic Heart Failure                             | Congestive heart failure                         | Per chart review; heart failure with preserved versus reduced ejection fraction                                                                                                                                          |
| Chronic Pulmonary Disease                         | Chronic obstructive pulmonary disease            | Per chart review                                                                                                                                                                                                         |
|                                                   | Asthma                                           | Per chart review                                                                                                                                                                                                         |
| Chronic Liver Disease                             | Chronic liver disease                            | Cirrhosis, alcohol-related liver disease, nonalcoholic fatty liver disease, autoimmune hepatitis, hepatitis B or hepatitis C, primary biliary cirrhosis, or other                                                        |
| Diabetes Mellitus                                 | Diabetes mellitus                                | Per chart review; insulin versus non-insulin dependent                                                                                                                                                                   |
| Renal Disease                                     | Chronic kidney disease                           | Baseline eGFR <60 ml/min/1.73m <sup>2</sup> on at least two consecutive values at least 12 weeks apart prior to hospital admission. If not available, defined as per chart review                                        |
|                                                   | End stage renal disease                          | Per chart review; on hemodialysis or peritoneal dialysis                                                                                                                                                                 |
| Any active malignancy including leukemia/lymphoma | Cancer                                           | Per chart review; active malignancy (other than non-melanoma skin cancer) treated in the past year. Defined as cancer of the lung, breast, colorectal, prostate, gastric, pancreatic, melanoma, ovarian, brain, or other |

**Table S4. CSC algorithm performance in groups of two or five patients by race**

In sub-cohorts of White or Black patients, the New York (NY) (SOFA score grouping only), modified Colorado (CO) (SOFA score groupings with comorbidities scoring) and a hypothetical algorithm of raw SOFA scores without grouping were examined in simulation of 1,000 random groups of two or five patients. Algorithms’ “decisions” in selecting a “winning” patient or requiring a lottery tie-breaker were assessed. **Column A.** Percent of decisions that did not require tie-breakers (i.e., two or more patients not tied for the “best” (lowest) priority score). **Column B.** Among the decisions not requiring tie-breakers, percent of decisions in which the algorithm selected a patient with a better outcome (i.e., survival). **Column C.** Percent of correct selections (i.e., selecting a surviving patient) across all decisions (i.e., all decisions regardless whether selected by priority score or tie-breaking lottery).

**S4A. CSC algorithm performance in groups of two by race<sup>a</sup>.**

|                                    | <b>A.</b>                                        | 95% CI | <b>B.</b>                                            | 95% CI | <b>C.</b>                                     | 95% CI |                                    | <b>A.</b>                                        | 95% CI | <b>B.</b>                                            | 95% CI | <b>C.</b>                                     | 95% CI |
|------------------------------------|--------------------------------------------------|--------|------------------------------------------------------|--------|-----------------------------------------------|--------|------------------------------------|--------------------------------------------------|--------|------------------------------------------------------|--------|-----------------------------------------------|--------|
|                                    | Percent decision not needing lottery tie-breaker |        | Percent correct among decision not requiring lottery |        | Overall performance: percent correct decision |        |                                    | Percent decision not needing lottery tie-breaker |        | Percent correct among decision not requiring lottery |        | Overall performance: percent correct decision |        |
| <b>White:</b>                      |                                                  |        |                                                      |        |                                               |        | <b>Black:</b>                      |                                                  |        |                                                      |        |                                               |        |
| <b>Groups of Two</b>               |                                                  |        |                                                      |        |                                               |        | <b>Groups of Two</b>               |                                                  |        |                                                      |        |                                               |        |
| New York*                          | 49                                               | 44-54  | 73                                                   | 68-78  | 61                                            | 57-65  | New York                           | 56                                               | 51-60  | 68                                                   | 63-73  | 60                                            | 56-64  |
| Colorado                           | 76                                               | 73-81  | 74                                                   | 70-78  | 68                                            | 52-61  | Colorado                           | 76                                               | 73-80  | 65                                                   | 61-70  | 61                                            | 57-65  |
| Raw Sofa                           | 88                                               | 85-91  | 66                                                   | 62-70  | 64                                            | 60-68  | Raw Sofa                           | 89                                               | 86-92  | 62                                                   | 57-66  | 61                                            | 57-65  |
| <i>Algorithm + Age Tie-Breaker</i> |                                                  |        |                                                      |        |                                               |        | <i>Algorithm + Age Tie-Breaker</i> |                                                  |        |                                                      |        |                                               |        |
| New York + Age                     | 89                                               | 87-92  | 71                                                   | 67-75  | 69                                            | 65-73  | New York + Age                     | 90                                               | 87-92  | 66                                                   | 62-69  | 64                                            | 61-69  |
| Colorado + Age*                    | 93                                               | 90-95  | 71                                                   | 67-75  | 70                                            | 66-73  | Colorado + Age                     | 94                                               | 92-96  | 63                                                   | 58-68  | 62                                            | 58-66  |
| Raw Sofa + Age                     | 98*                                              | 96-99  | 66                                                   | 63-71  | 65                                            | 61-70  | Raw Sofa + Age                     | 98                                               | 96-99  | 62                                                   | 57-66  | 62                                            | 59-66  |

**S4B. CSC algorithm performance in groups of five by race<sup>a</sup>.**

|                                                | <b>A.</b>                                                           | 95% CI | <b>B.</b>                                                              | 95% CI | <b>C.</b>                                                      | 95%   |                                               | <b>A.</b>                                                           | 95%   | <b>B.</b>                                                              | 95%   | <b>C.</b>                                                      | 95% CI |
|------------------------------------------------|---------------------------------------------------------------------|--------|------------------------------------------------------------------------|--------|----------------------------------------------------------------|-------|-----------------------------------------------|---------------------------------------------------------------------|-------|------------------------------------------------------------------------|-------|----------------------------------------------------------------|--------|
|                                                | Percent<br>decision<br>not<br>needing<br>lottery<br>tie-<br>breaker |        | Percent<br>correct<br>among<br>decision<br>not<br>requiring<br>lottery |        | Overall<br>perfor-<br>mance:<br>percent<br>correct<br>decision | CI    |                                               | Percent<br>decision<br>not<br>needing<br>lottery<br>tie-<br>breaker | CI    | Percent<br>correct<br>among<br>decision<br>not<br>requiring<br>lottery | CI    | Overall<br>perfor-<br>mance:<br>percent<br>correct<br>decision |        |
| <b>White<br/>Groups of<br/>Five</b>            |                                                                     |        |                                                                        |        |                                                                |       | <b>Black<br/>Groups of<br/>Five</b>           |                                                                     |       |                                                                        |       |                                                                |        |
| New York*                                      | 6                                                                   | 5-7    | 64*                                                                    | 51-75  | 61                                                             | 58-64 | New York                                      | 12                                                                  | 10-14 | 63*                                                                    | 51-71 | 60                                                             | 57-63  |
| Colorado                                       | 58                                                                  | 56-61  | 74                                                                     | 70-77  | 71                                                             | 69-74 | Colorado                                      | 58                                                                  | 55-61 | 66                                                                     | 63-70 | 63                                                             | 60-65  |
| Raw Sofa                                       | 78                                                                  | 76-81  | 66                                                                     | 63-69  | 65                                                             | 62-69 | Raw Sofa                                      | 81                                                                  | 78-83 | 60                                                                     | 57-63 | 60                                                             | 57-63  |
| <i>Algorithm -<br/>Age as Tie-<br/>Breaker</i> |                                                                     |        |                                                                        |        |                                                                |       | <i>Algorithm +<br/>Age as<br/>Tie-Breaker</i> |                                                                     |       |                                                                        |       |                                                                |        |
| New York<br>+ Age                              | 68                                                                  | 64-70  | 72                                                                     | 69-75  | 71                                                             | 69-73 | New York<br>+ Age                             | 73                                                                  | 71-76 | 69                                                                     | 64-72 | 67                                                             | 64-70  |
| Colorado<br>+ Age*                             | 83                                                                  | 81-86  | 73                                                                     | 70-76  | 73                                                             | 69-75 | Colorado<br>+ Age                             | 85                                                                  | 83-87 | 64                                                                     | 61-67 | 63                                                             | 60-65  |
| Raw Sofa<br>+ Age                              | 94                                                                  | 93-96  | 67                                                                     | 64-70  | 67                                                             | 64-70 | Raw Sofa<br>+ Age                             | 95                                                                  | 94-96 | 62                                                                     | 58-64 | 61                                                             | 58-64  |

**Figure S1. Study Cohort**

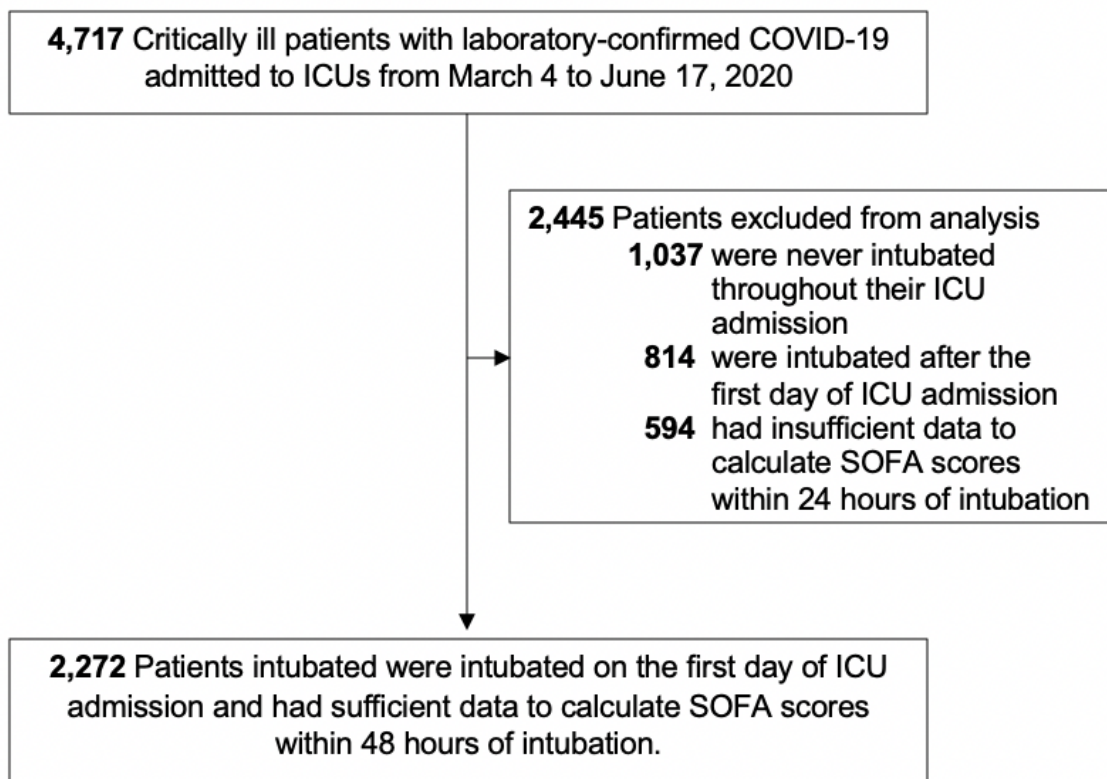

*Abbreviations: ICU, Intensive Care Unit; SOFA, Sequential Organ Failure Assessment*

**Figure S2. Sensitivity analysis for the association of priority scores or categories with 28-day mortality.**

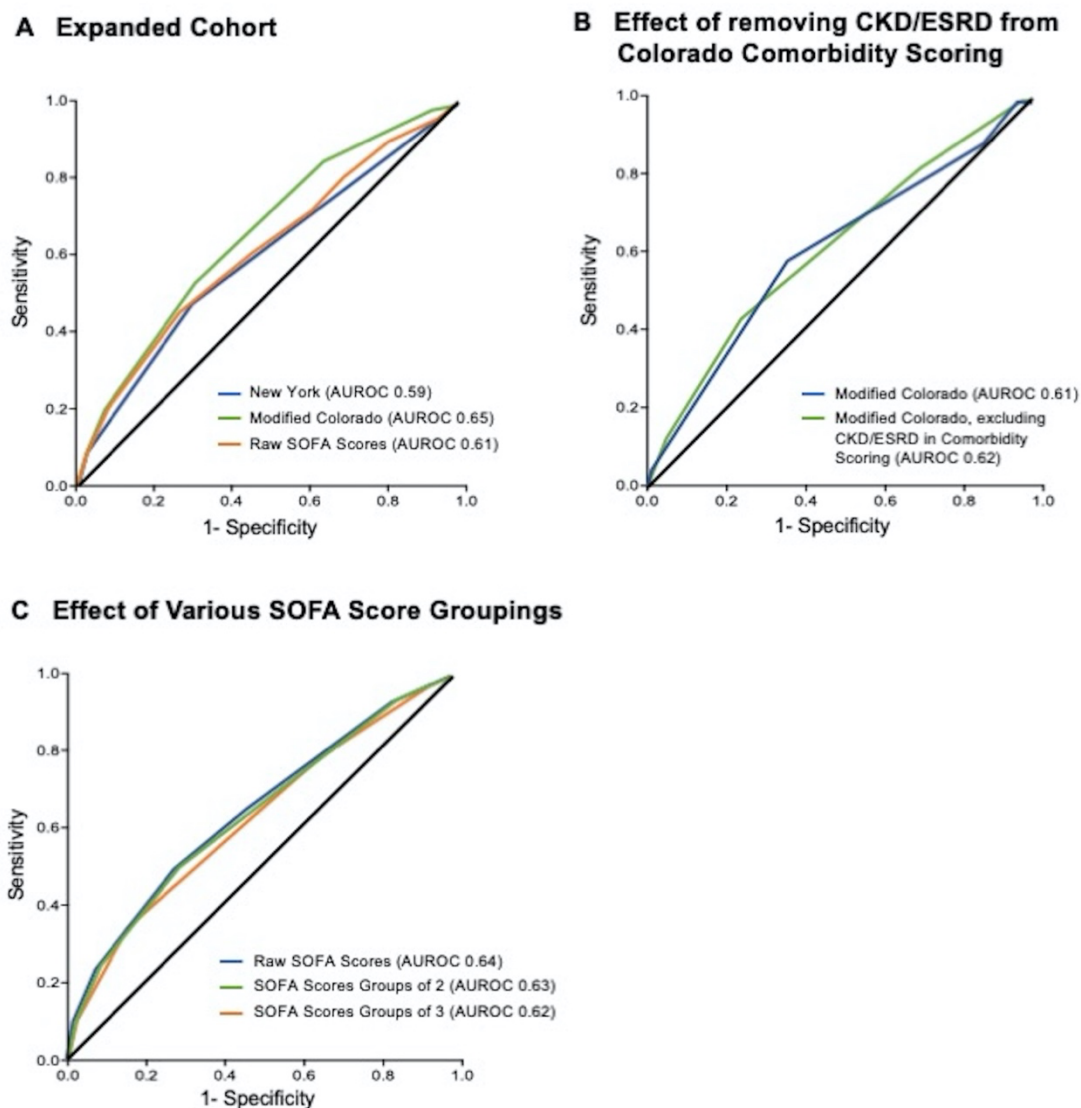

**Figure S2. A-C:** AUROC curves for discrimination of 28-day mortality by priority scores are shown for the following sensitivity analyses: **A.** The cohort was expanded to a total of 2,866 patients, which includes the 594 patients that were excluded due insufficient data to calculate SOFA scores in the original analysis (Figure S1) and the 2,272 patient included in the original analysis. The three algorithms (New York, Colorado, Raw SOFA Scores) were applied to the expanded cohort. **B.** In the modified Colorado algorithm, CKD/ESRD could be “counted double,” by contributing to both the SOFA scoring and the comorbidities scoring. The modified Colorado algorithm was compared to a version excluding CKD/ESRD from comorbidity scoring. **C.** Hypothetical algorithms of grouping SOFA scores in ranges of two or groupings in ranges of three were applied to the study cohort to generate priority points. The hypothetical algorithm of raw (ungrouped SOFA scores) was compared to the groupings of SOFA scores in ranges of 2 and ranges of 3.

**Figure S3. Performance of CSC algorithms according to race or ethnicity**

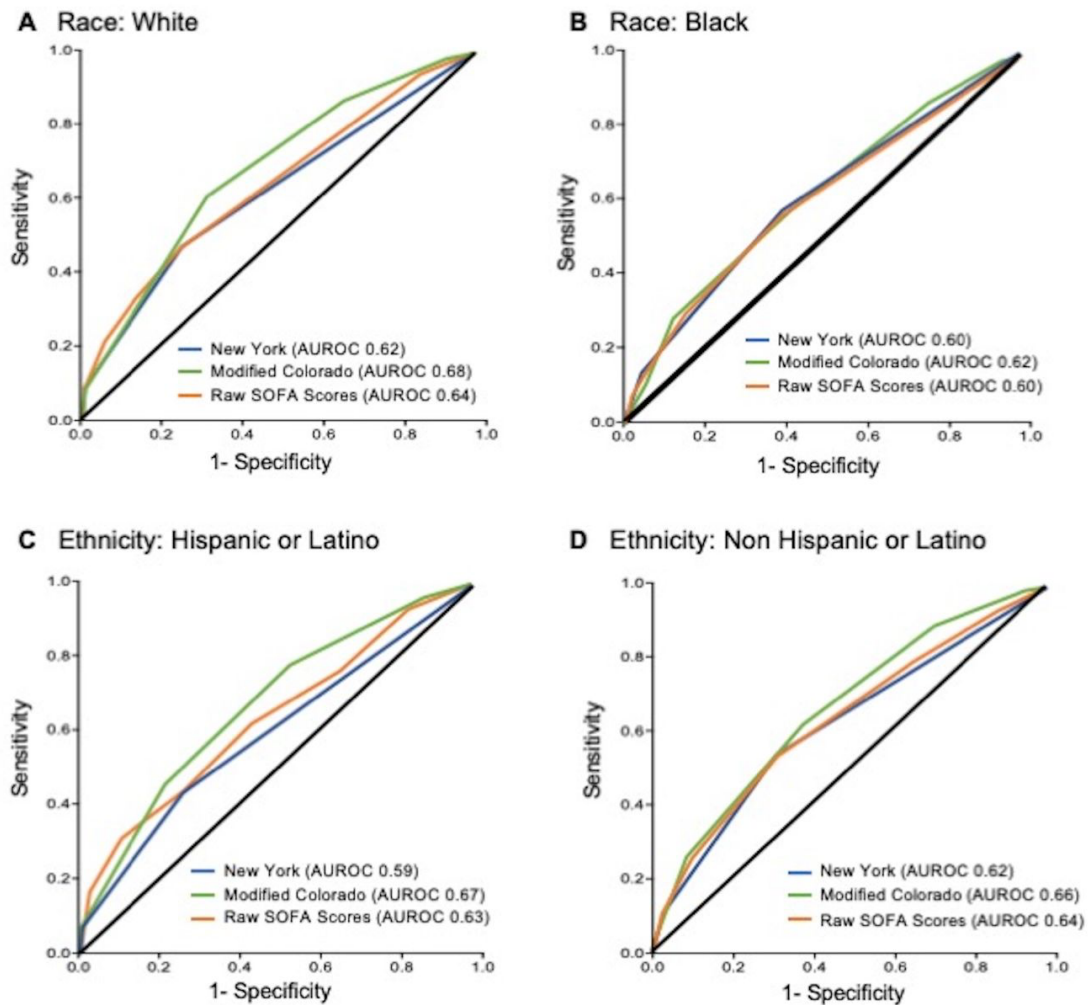

**Figure S3.** The state CSC or hypothetical raw SOFA score algorithms were applied to sub-cohorts defined by race or ethnicity to generate priority scores. The accuracy of priority scores in predicting 28-day mortality after ICU admission and intubation were assessed by AUROC curve. There were no statistically significant differences in AUROC for each algorithm across race or ethnicity ( $p > 0.05$ ).
